# Supplementary material for: Nutritional Biomarkers and Factors Correlated with Poor Sleep Status among Young Females: A Case-Control Study
Source: MDPI journal article supplement (doi:10.3390/nu14142898), 2022-07-14
Supplement: s1 [file s1]

**Supplementary Table 1.** Sleep indices across normal weight and obese group <sup>1,2</sup>

| Characteristics         | Total<br>(n=92) | Normal weight<br>BMI = 18.5-24.9<br>(n=48) | Obese group<br>BMI ≥30<br>(n=44) | p-Value |
|-------------------------|-----------------|--------------------------------------------|----------------------------------|---------|
| Total hours of sleep    | 5.0 ± 1.9       | 5.0 ± 1.8                                  | 4.9 ± 2.1                        | 0.733   |
| <b>Sleep components</b> |                 |                                            |                                  |         |
| <b>Quality</b>          |                 |                                            |                                  |         |
| Very good               | 26 (28.3)       | 16 (33.3)                                  | 10 (22.7)                        | 0.294   |
| Fairly good             | 45 (48.9)       | 23 (47.9)                                  | 22 (50)                          |         |
| Fairly bad              | 17 (18.5)       | 6 (12.5)                                   | 11 (25)                          |         |
| Very bad                | 4 (4.3)         | 3 (6.2)                                    | 1 (2.3)                          |         |
| <b>Latency</b>          |                 |                                            |                                  |         |
| 0                       | 18 (19.6)       | 10 (20.8)                                  | 8 (18.2)                         | 0.702   |
| 1 – 2                   | 32 (34.8)       | 18 (37.5)                                  | 14 (31.8)                        |         |
| 3 – 4                   | 26 (28.3)       | 11 (22.9)                                  | 15 (34.1)                        |         |
| 5 – 6                   | 16 (17.4)       | 9 (18.8)                                   | 7 (15.9)                         |         |
| <b>Duration</b>         |                 |                                            |                                  |         |
| > 7 hours               | 16 (17.4)       | 7 (14.6)                                   | 9 (20.5)                         | 0.433   |
| 6 – 7 hours             | 18 (19.6)       | 11 (22.9)                                  | 7 (15.9)                         |         |
| 5 – 6 hours             | 30 (32.6)       | 18 (37.5)                                  | 12 (27.3)                        |         |
| < 5 hours               | 28 (30.4)       | 12 (25)                                    | 16 (36.4)                        |         |
| <b>Efficiency</b>       |                 |                                            |                                  |         |
| > 85%                   | 67 (72.8)       | 36 (75)                                    | 31 (70.5)                        | 0.594   |
| 75 – 84%                | 13 (14.1)       | 5 (10.4)                                   | 8 (18.2)                         |         |
| 65 – 74%                | 4 (4.3)         | 3 (6.2)                                    | 1 (2.3)                          |         |
| < 65%                   | 8 (8.7)         | 4 (8.3)                                    | 4 (9.1)                          |         |
| <b>Disturbance</b>      |                 |                                            |                                  |         |
| 0                       | 6 (6.5)         | 3 (6.2)                                    | 3 (6.8)                          | 0.293   |
| 1 – 9                   | 72 (78.3)       | 35 (72.9)                                  | 37 (84.1)                        |         |
| 10 – 18                 | 14 (15.2)       | 10 (20.8)                                  | 4 (9.1)                          |         |
| <b>Medication</b>       |                 |                                            |                                  |         |
| Not during past month   | 87 (94.6)       | 44 (91.7)                                  | 43 (97.7)                        | 0.241   |
| Less than once a week   | 2 (2.2)         | 1 (2.1)                                    | 1 (2.3)                          |         |
| Once or twice a week    | 3 (3.3)         | 3 (6.2)                                    | 0 (0)                            |         |
| <b>Day Dysfunction</b>  |                 |                                            |                                  |         |
| 0                       | 7 (7.6)         | 5 (10.4)                                   | 2 (4.5)                          | 0.628   |
| 1 – 2                   | 31 (33.7)       | 17 (35.4)                                  | 14 (31.8)                        |         |
| 3 – 4                   | 31 (33.7)       | 14 (29.2)                                  | 17 (38.6)                        |         |
| 5 – 6                   | 23 (25)         | 12 (25)                                    | 11 (25)                          |         |
| <b>PSQI Score</b>       |                 |                                            |                                  |         |
| Good                    | 14 (15.2)       | 8 (16.7)                                   | 6 (13.6)                         | 0.686   |
| Poor                    | 78 (84.4)       | 40 (83.3)                                  | 38 (86.4)                        |         |

<sup>1</sup>Continuous variables are presented as (mean ± standard deviation (SD)); Median (1st quartile – 3rd Quartile) for non-normal continuous variables.

<sup>2</sup>Categorical and binary variables are presented as [n, (%)].

<sup>3</sup> The Pittsburgh Sleep Quality Index (PSQI)
